# Supplementary material for: Site-selective and cooperative doping of Gd3Al5O12:Ce garnets for structural stabilization and warm WLED lighting of low CCT and high CRI
Source: Royal Society of Chemistry journal article supplement (doi:10.1039/d1dt03599a), 2021-12-01
Supplement: d1dt03599a1.pdf [file d1dt03599a1.pdf]

Supporting information

**Site-selective and cooperative doping of  $Gd_3Al_5O_{12}$ :Ce garnet for structure stabilization and warm w-LED lighting of low CCT and high CRI**

Qinghong Meng,<sup>a</sup> Guoying Zhao,<sup>b,c</sup> Qi Zhu,<sup>a</sup> Xiaodong Li,<sup>a</sup> Xudong Sun,<sup>a,d</sup> Ji-Guang Li<sup>c,\*</sup>

<sup>a</sup>*Key Laboratory for Anisotropy and Texture of Materials (Ministry of Education) and School of Materials Science and Engineering, Northeastern University, Shenyang, Liaoning 110819, China*

<sup>b</sup>*School of Materials Science and Engineering, Shanghai Institute of Technology, Shanghai 201418, China*

<sup>c</sup>*Research Center for Functional Materials, National Institute for Materials Science, 1-1 Namiki, Tsukuba, Ibaraki 305-0044, Japan*

<sup>d</sup>*Foshan Graduate school of Northeastern University, Foshan, Guangdong 528311, China*

\*Corresponding author

Dr. Ji-Guang Li

National Institute for Materials Science

Tel: +81-29-860-4394

E-mail: [LI.Jiguang@nims.go.jp](mailto:LI.Jiguang@nims.go.jp)

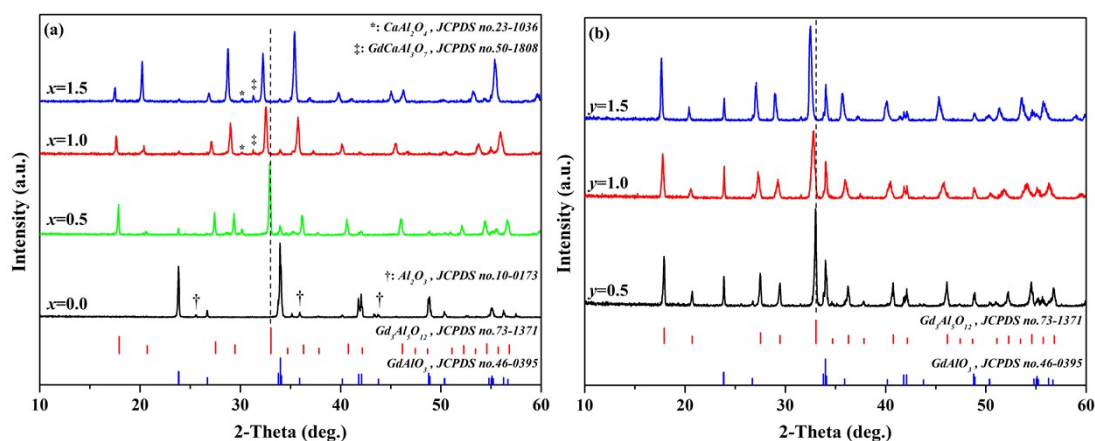

**Fig. S1** XRD patterns of the  $\text{Gd}_{3-x}\text{Ca}_x\text{Hf}_x\text{Al}_{5-x}\text{O}_{12}$  ( $x = 0-1.5$ ; part a) and  $\text{Gd}_3\text{Sc}_y\text{Al}_{5-y}\text{O}_{12}$  ( $y = 0.5-1.5$ ; part b) powders obtained by calcining in air at  $1550^\circ\text{C}$  for 6 h. The red and blue vertical bars donate the standard diffraction of  $\text{Gd}_3\text{Al}_5\text{O}_{12}$  (JCPDS No. 73-1371) and  $\text{GdAlO}_3$  (JCPDS No. 46-0395), respectively. The symbols †, ‡ and \* in (a) denote  $\alpha\text{-Al}_2\text{O}_3$ ,  $\text{GdCaAl}_3\text{O}_7$  and  $\text{CaAl}_2\text{O}_4$ , respectively.

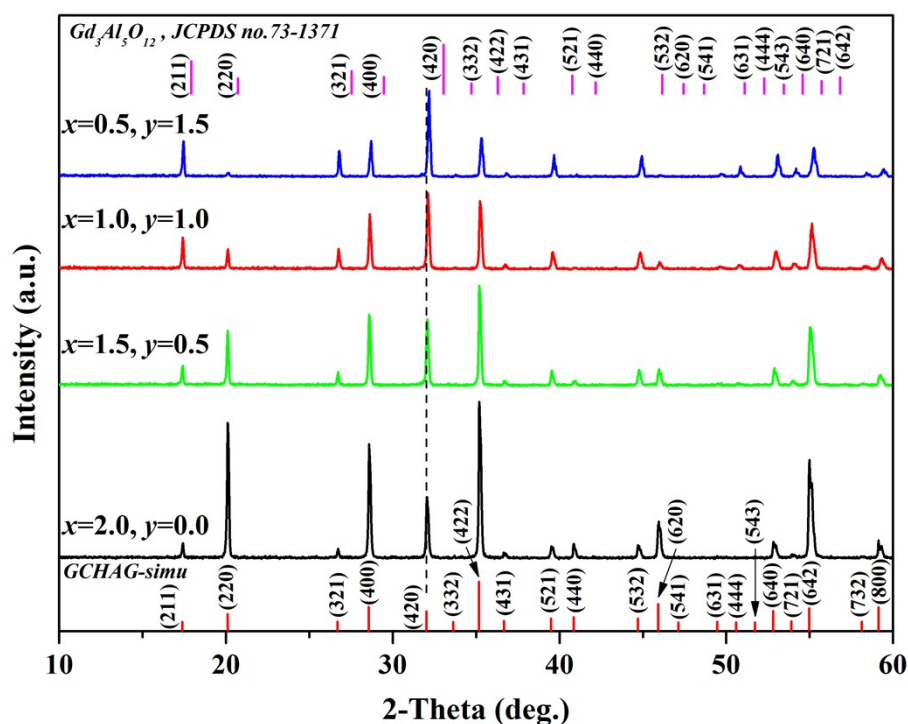

**Fig. S2** XRD patterns of the  $\text{Gd}_{3-x}\text{Ca}_x\text{Hf}_x\text{Sc}_y\text{Al}_3\text{O}_{12}$  powders ( $x = 0.5-2.0$ ,  $y = 0.0-1.5$ ,  $x + y = 2.0$ ). The red and pink vertical bars donate the simulated diffractions of  $\text{GdCa}_2\text{Hf}_2\text{Al}_3\text{O}_{12}$  ( $x = 2.0$ ,  $y = 0$ ) and the standard diffractions of  $\text{Gd}_3\text{Al}_5\text{O}_{12}$  (JCPDS No. 73-1371), respectively.

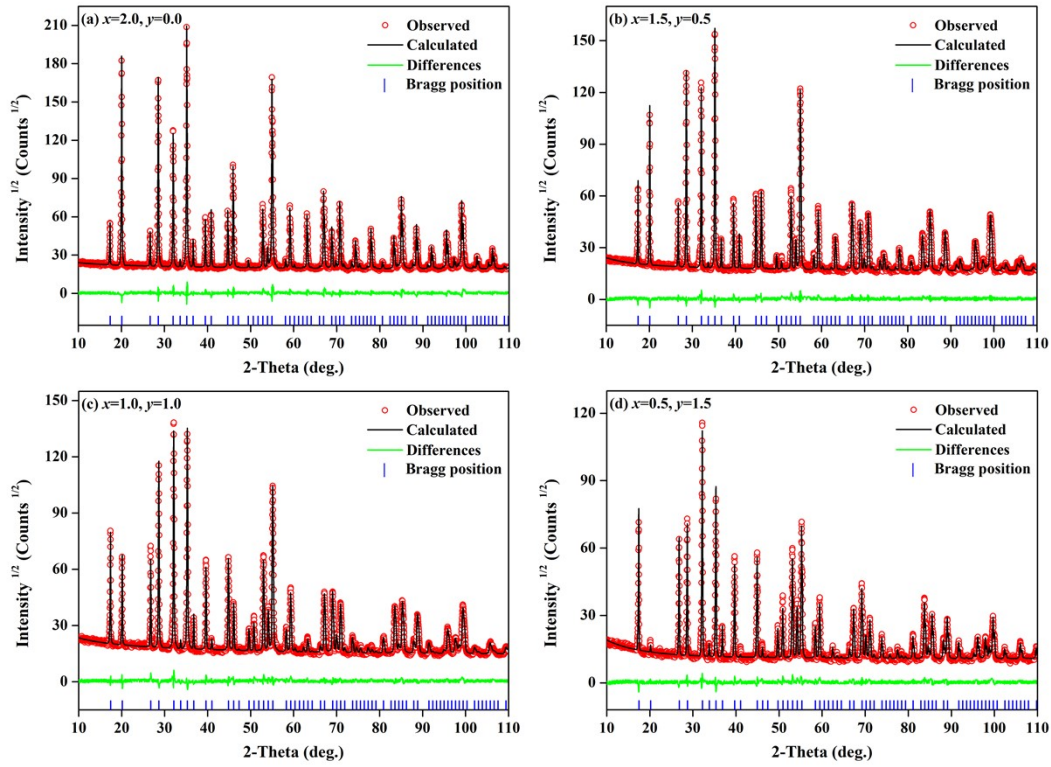

**Fig. S3** The results of Rietveld refinement of XRD pattern for the  $\text{Gd}_{3-x}\text{Ca}_x\text{Hf}_y\text{Sc}_y\text{Al}_3\text{O}_{12}$  powders ( $x = 0.5\text{--}2.0$ ,  $y = 0.0\text{--}1.5$ ,  $x + y = 2.0$ ).

**Table S1** Crystallographic data, atomic coordinates ( $x$ ,  $y$ ,  $z$ ), atomic occupancy (Occ.) and isotropic displacement parameter ( $\text{\AA}^2$ ) for the  $\text{Gd}_{3-x}\text{Ca}_x\text{Hf}_y\text{Sc}_y\text{Al}_3\text{O}_{12}$  garnets ( $x = 0.5\text{--}2.0$ ,  $y = 0.0\text{--}1.5$ ,  $x + y = 2.0$ ).

| $x=2.0, y=0.0$                                                                         | Atom | Position | $x$       | $y$       | $z$       | Occ.  | $B_{\text{iso}}$ |
|----------------------------------------------------------------------------------------|------|----------|-----------|-----------|-----------|-------|------------------|
| $\text{GdCa}_2\text{Hf}_2\text{Al}_3\text{O}_{12}$                                     | Gd   | 24c      | 1/8       | 0         | 1/4       | 0.333 | 0.21(4)          |
| $a=b=c = 12.4885(2) \text{ \AA}$                                                       | Ca   | 24c      | 1/8       | 0         | 1/4       | 0.667 | 0.21(4)          |
| $R_{\text{wp}} = 9.08\%$                                                               | Hf   | 16a      | 0         | 0         | 0         | 1     | 0.25(2)          |
| $R_{\text{p}} = 6.72\%$                                                                | Al   | 24d      | 3/8       | 0         | 1/4       | 1     | 0.25(1)          |
| $\chi^2 = 2.70$                                                                        | O    | 96h      | 0.9636(3) | 0.0511(3) | 0.1598(3) | 1     | 0.20(1)          |
| $x=1.5, y=0.5$                                                                         |      |          |           |           |           |       |                  |
| $\text{Gd}_{1.5}\text{Ca}_{1.5}\text{Hf}_{1.5}\text{Sc}_{0.5}\text{Al}_3\text{O}_{12}$ | Gd   | 24c      | 1/8       | 0         | 1/4       | 0.5   | 0.22(3)          |
| $a=b=c = 12.4695(3) \text{ \AA}$                                                       | Ca   | 24c      | 1/8       | 0         | 1/4       | 0.5   | 0.22(3)          |
| $R_{\text{wp}} = 8.16\%$                                                               | Hf   | 16a      | 0         | 0         | 0         | 0.75  | 0.08(2)          |
| $R_{\text{p}} = 6.26\%$                                                                | Sc   | 16a      | 0         | 0         | 0         | 0.25  | 0.08(2)          |
| $\chi^2 = 2.05$                                                                        | Al   | 24d      | 3/8       | 0         | 1/4       | 1     | 0.21(8)          |
|                                                                                        | O    | 96h      | 0.9631(2) | 0.0522(3) | 0.1603(2) | 1     | 0.40(1)          |

|                                                                                        |    |     |           |           |           |       |         |
|----------------------------------------------------------------------------------------|----|-----|-----------|-----------|-----------|-------|---------|
| $x=1.0, y=1.0$                                                                         |    |     |           |           |           |       |         |
| $\text{Gd}_2\text{CaHfScAl}_3\text{O}_{12}$                                            | Gd | 24c | 1/8       | 0         | 1/4       | 0.667 | 0.18(3) |
| $a=b=c = 12.4509(2) \text{ \AA}$                                                       | Ca | 24c | 1/8       | 0         | 1/4       | 0.333 | 0.18(3) |
| $R_{\text{wp}} = 8.88\%$                                                               | Hf | 16a | 0         | 0         | 0         | 0.5   | 0.27(3) |
| $R_{\text{p}} = 6.70\%$                                                                | Sc | 16a | 0         | 0         | 0         | 0.5   | 0.27(3) |
| $\chi^2 = 2.12$                                                                        | Al | 24d | 3/8       | 0         | 1/4       | 1     | 0.08(7) |
|                                                                                        | O  | 96h | 0.9627(2) | 0.0536(3) | 0.1605(3) | 1     | 0.04(1) |
| $x=0.5, y=1.5$                                                                         |    |     |           |           |           |       |         |
| $\text{Gd}_{2.5}\text{Ca}_{0.5}\text{Hf}_{0.5}\text{Sc}_{1.5}\text{Al}_3\text{O}_{12}$ | Gd | 24c | 1/8       | 0         | 1/4       | 0.833 | 0.22(3) |
| $a=b=c = 12.4217(1) \text{ \AA}$                                                       | Ca | 24c | 1/8       | 0         | 1/4       | 0.167 | 0.22(3) |
| $R_{\text{wp}} = 11.32\%$                                                              | Hf | 16a | 0         | 0         | 0         | 0.25  | 0.46(5) |
| $R_{\text{p}} = 8.70\%$                                                                | Sc | 16a | 0         | 0         | 0         | 0.75  | 0.46(5) |
| $\chi^2 = 1.92$                                                                        | Al | 24d | 3/8       | 0         | 1/4       | 1     | 0.29(9) |
|                                                                                        | O  | 96h | 0.9621(3) | 0.0548(4) | 0.1610(4) | 1     | 0.22(1) |

$\chi^2$  was defined as  $R_{\text{wp}}/R_{\text{exp}}$  in the Users' Manual of TOPAS V4.2 software.  $R_{\text{p}}$ ,  $R_{\text{wp}}$  and  $R_{\text{exp}}$  are pattern reliability factor, weighted profile reliability factor and expected reliability factor, respectively.

**Table S2** The bond distances of  $d_4$ ,  $d_6$ ,  $d_{82}$ ,  $d_{84}$ ,  $d_{\text{av}}$ ,  $d_{88}$  and  $d_{81}$  for the  $\text{Gd}_{3-x}\text{Ca}_x\text{Hf}_x\text{Sc}_y\text{Al}_3\text{O}_{12}$  garnets ( $x = 0.5-2.0$ ,  $y = 0.0-1.5$ ,  $x + y = 2.0$ ).

|                | $d_4$     | $d_6$     | $d_{82}$  | $d_{84}$  | $d_{\text{av}}$ | $d_{88}$ | $d_{81}$ |
|----------------|-----------|-----------|-----------|-----------|-----------------|----------|----------|
| $x=2.0, y=0.0$ | 1.7035(4) | 2.1434(4) | 2.3952(4) | 2.5627(4) | 2.4790          | 2.8999   | 2.9998   |
| $x=1.5, y=0.5$ | 1.6973(3) | 2.1520(3) | 2.3986(3) | 2.5473(4) | 2.4730          | 2.8782   | 2.9697   |
| $x=1.0, y=1.0$ | 1.6968(3) | 2.1575(3) | 2.4015(3) | 2.5285(4) | 2.4650          | 2.8537   | 2.9391   |
| $x=0.5, y=1.5$ | 1.6903(5) | 2.1646(5) | 2.4038(4) | 2.5097(5) | 2.4568          | 2.8356   | 2.9114   |

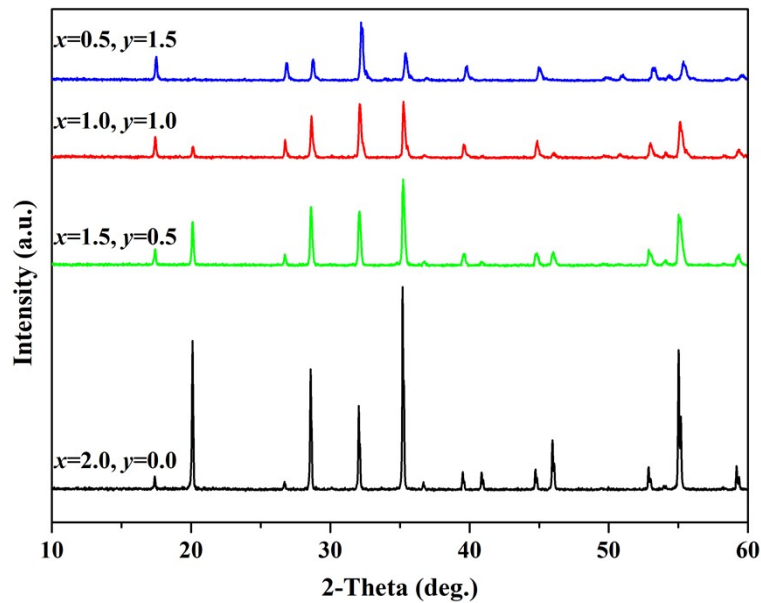

**Fig. S4** XRD patterns of the  $\text{Gd}_{2.97-x}\text{Ca}_x\text{Hf}_x\text{Sc}_y\text{Al}_3\text{O}_{12}:0.03\text{Ce}$  phosphors ( $x = 0.5-2.0$ ,  $y = 0.0-1.5$ ,  $x + y = 2.0$ ).

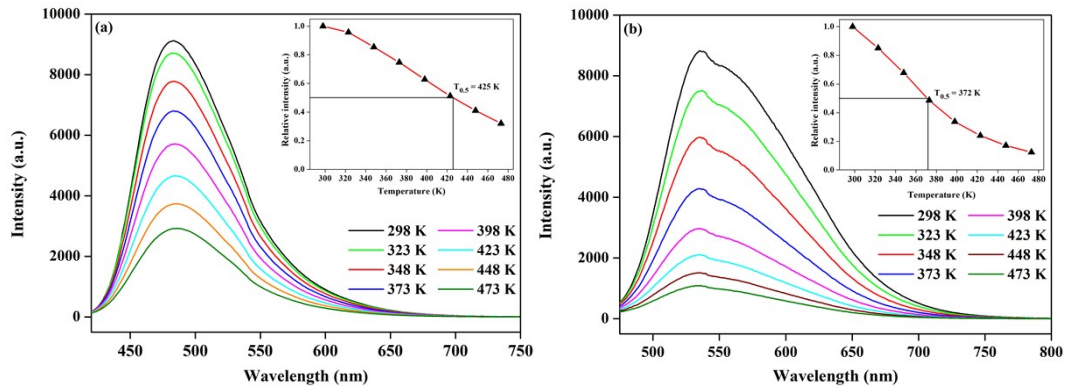

**Fig. S5** Temperature-dependent photoluminescence spectra for  $\text{Gd}_{0.97}\text{Ca}_2\text{Hf}_2\text{Al}_3\text{O}_{12}:0.03\text{Ce}$  (a,  $\lambda_{\text{ex}} = 408$  nm) and  $\text{Gd}_{2.47}\text{Ca}_{0.5}\text{Hf}_{0.5}\text{Sc}_{1.5}\text{Al}_3\text{O}_{12}:0.03\text{Ce}$  (b,  $\lambda_{\text{ex}} = 452$  nm). The inset in (a) and (b) present the relative intensity of emission as a function of the measurement temperature.
